# Supplementary material for: Gastrodin attenuates diabetic cardiomyopathy characterized by myocardial fibrosis by inhibiting the KLK8-PAR1 signaling axis
Source: PubMed Central journal article supplement (PMC11583739; doi:10.1186/s13020-024-01035-4), 2024-11-22
Supplement: 13020_2024_1035_MOESM1_ESM.pdf [file 13020_2024_1035_MOESM1_ESM.pdf]

---

Sept 22, 2024

Certificate no.: AYD2024091807

Total words edited: 7647

## CERTIFICATE OF EDITING

This is to certify that the manuscript attached herewith was edited for the proper English language, grammar, punctuation, spelling, and overall style by me or under my supervision.

### Manuscript Title

*Gastrodin attenuates diabetic cardiomyopathy characterized by myocardial fibrosis by inhibiting the KLK8-PAR1 signaling axis*



Feroz Khan, MS, PhD,

Ex. Faculty: University of California (UCSF), San Francisco, CA

**Email: [service@aiyidesci.com](mailto:service@aiyidesci.com)**

**[www.aiyidesci.com](http://www.aiyidesci.com)**

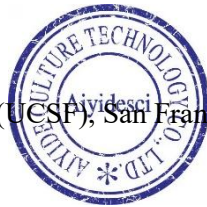

**Disclaimer:** The authors received an editable copy of the text and were free to alter/edit/reject/accept changes after editing. Hence, the version under consideration for publication may be different from the one we have provided; in such a case, the text attached herewith should be considered authentic or unaltered. Besides, many times, authors get selective editing that excludes headings, such as materials, methods, tables, figure legends, and/or bibliography. Even, in this case, only the text attached herewith should be considered edited.

---

4350 Kirkham St. San Francisco, CA 94122, USA

[www.aiyidesci.com](http://www.aiyidesci.com)
